# Supplementary material
Source: PubMed Central journal article supplement (PMC9345745)
Supplement: NIHMS1807571-supplement-Supp_materials.pdf [file NIHMS1807571-supplement-Supp_materials.pdf]

## **Supplemental Information**

### **Calpains as mechanistic drivers and therapeutic targets for ocular diseases**

Jennifer T. Vu<sup>1</sup>, Elena Wang<sup>1</sup>, Jolan Wu<sup>1</sup>, Young Joo Sun<sup>1</sup>, Gabriel Velez<sup>1</sup>, Alexander G. Bassuk<sup>2</sup>, Soo Hyeon Lee<sup>1</sup>, and Vinit B. Mahajan<sup>\*1,3</sup>

#### **Author Affiliations:**

<sup>1</sup>Molecular Surgery Laboratory, Byers Eye Institute, Department of Ophthalmology, Stanford University, Palo Alto, CA 94304, USA

<sup>2</sup>Department of Pediatrics, University of Iowa, Iowa City, IA, USA

<sup>3</sup>Department of Neurology, University of Iowa, Iowa City, IA, USA

<sup>4</sup>The Iowa Neuroscience Institute (INI), University of Iowa, Iowa City, IA, USA

<sup>5</sup>Veterans Affairs Palo Alto Health Care System, Palo Alto, CA 94304, USA

\*Correspondence: Vinit B. Mahajan, Byers Eye Institute, Department of Ophthalmology, Stanford University, Palo Alto, CA, 94304 USA. Phone: 650-723-6995. Fax: 650-498-1528. E-mail: [vinit.mahajan@stanford.edu](mailto:vinit.mahajan@stanford.edu)

## Supplemental Figures

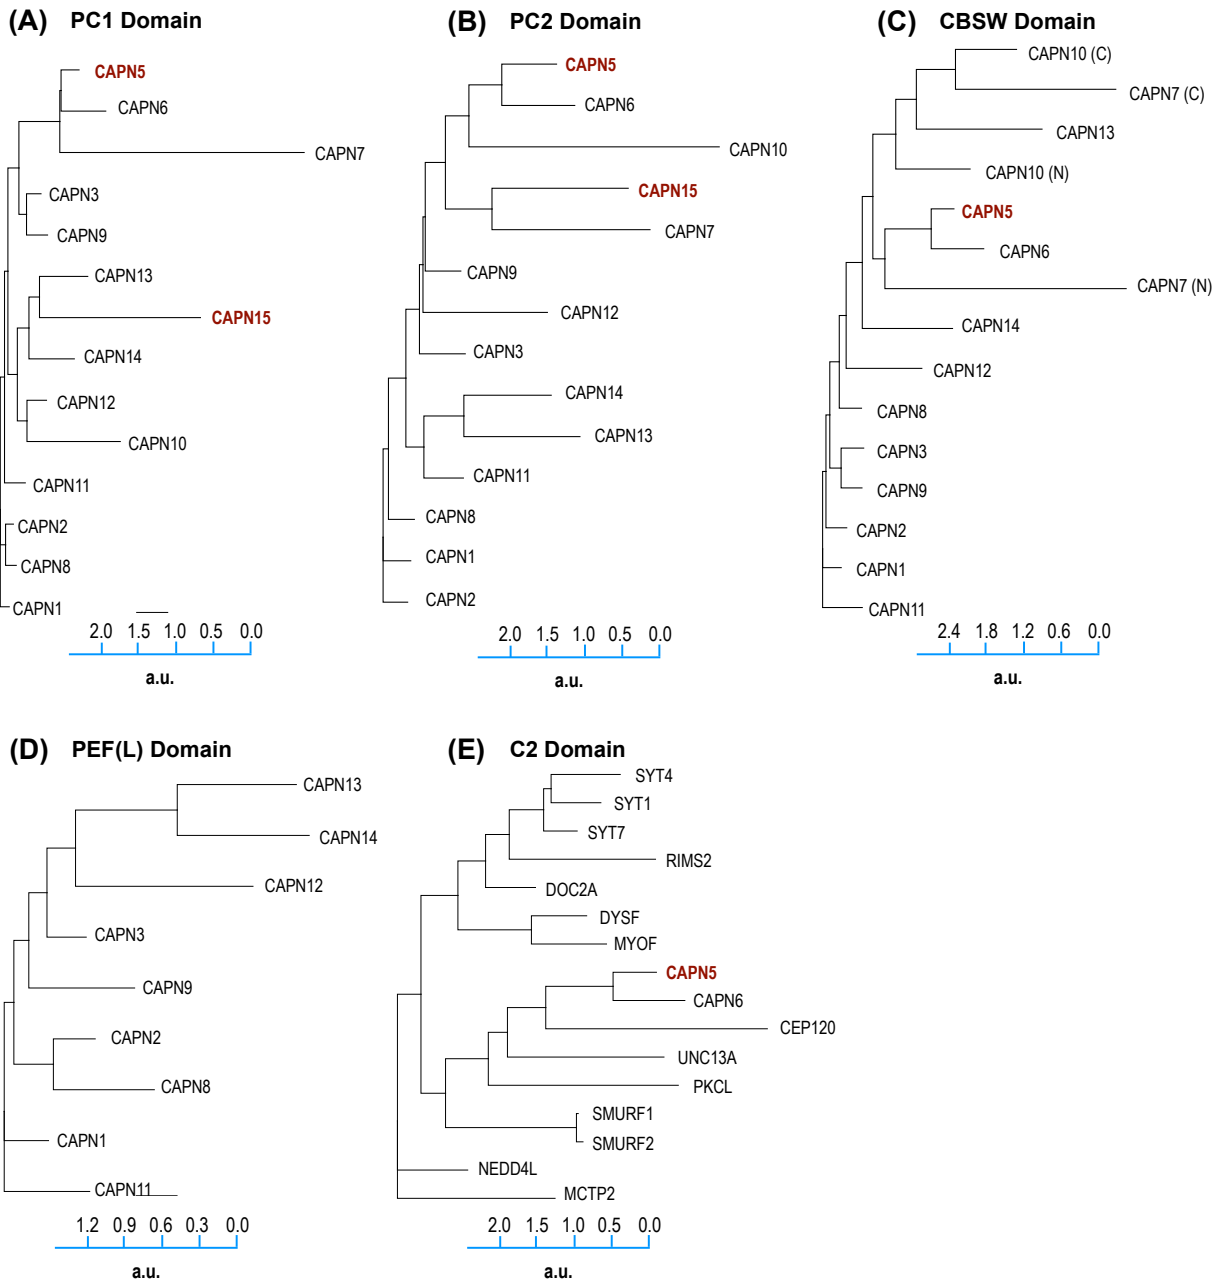

**Figure S1. Sequence-based phylogenetic tree of human calpain domains (related to Figure 2).**

Sequences representing individual human calpain domains (i.e., PC1, PC2, CBSW, PEF, and C2) underwent multiple sequence alignment (MSA) using MAFFT v7 (alignment strategy: FFT-NS-1). The MSA subsequently underwent phylogenetic reconstruction in IQ-TREE-1.6.2. The reconstructed human calpain domain (and C2-domain containing proteins, panel E) trees are shown: **(A) PC1**, **(B) PC2**, **(C) CBSW**, **(D) PEF(L)**, **(E) C2** demonstrating differences in clustering between one- and three-dimensional comparisons. Calpains in red text indicate that they are involved in ocular calpainopathies.

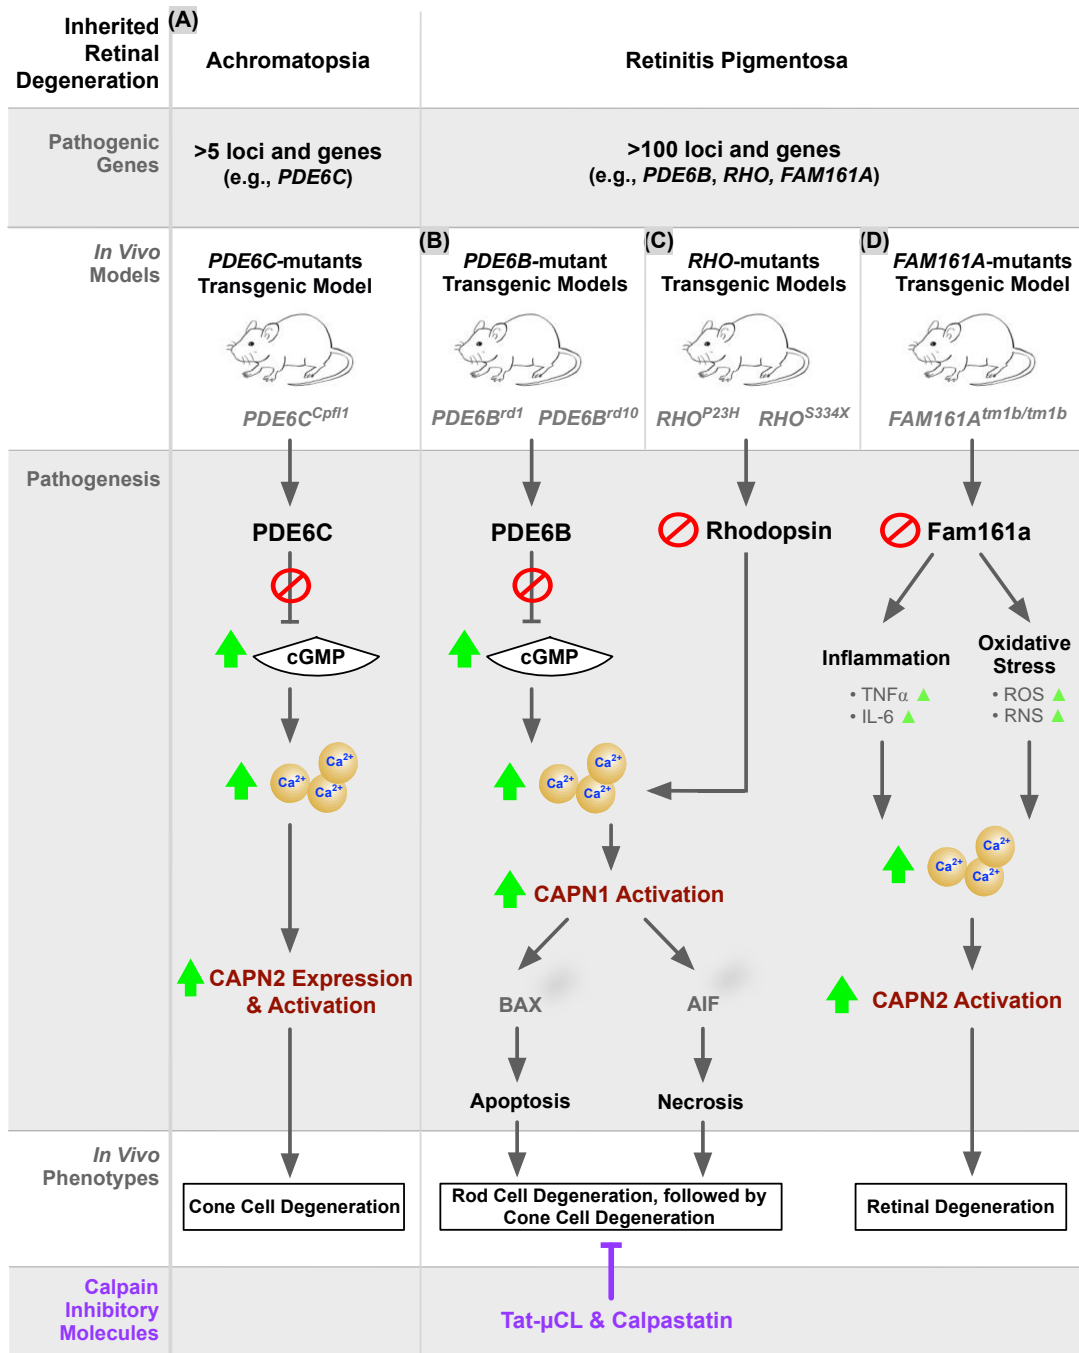

**Figure S2. Pathology of calpain-mediated inherited retinal degenerations in in vivo models.** Pathological mutations in (A) achromatopsia and (B-D) retinitis pigmentosa (RP) lead to calpain activation [1-3]. *PDE6C* mutations lead to cone cell death through increased CAPN2 expression and activation [1,4,5] while mutations in (B) *PDE6B* lead to rod cell death via increased CAPN1 activity [6,7]. (C) Rhodopsin (encoded by *RHO*) is a G-protein coupled receptor expressed on rod cells that is instrumental in conducting visual phototransduction. (D) Fam161a is a structural protein found in microtubule-organizing centers at the base of photoreceptor cells that is an integral part of the photoreceptor sensory cilium. Mutations that disrupt *RHO* or *FAM161A* cause retinal degeneration by activating CAPN1 and CAPN2, respectively [1,7-9].

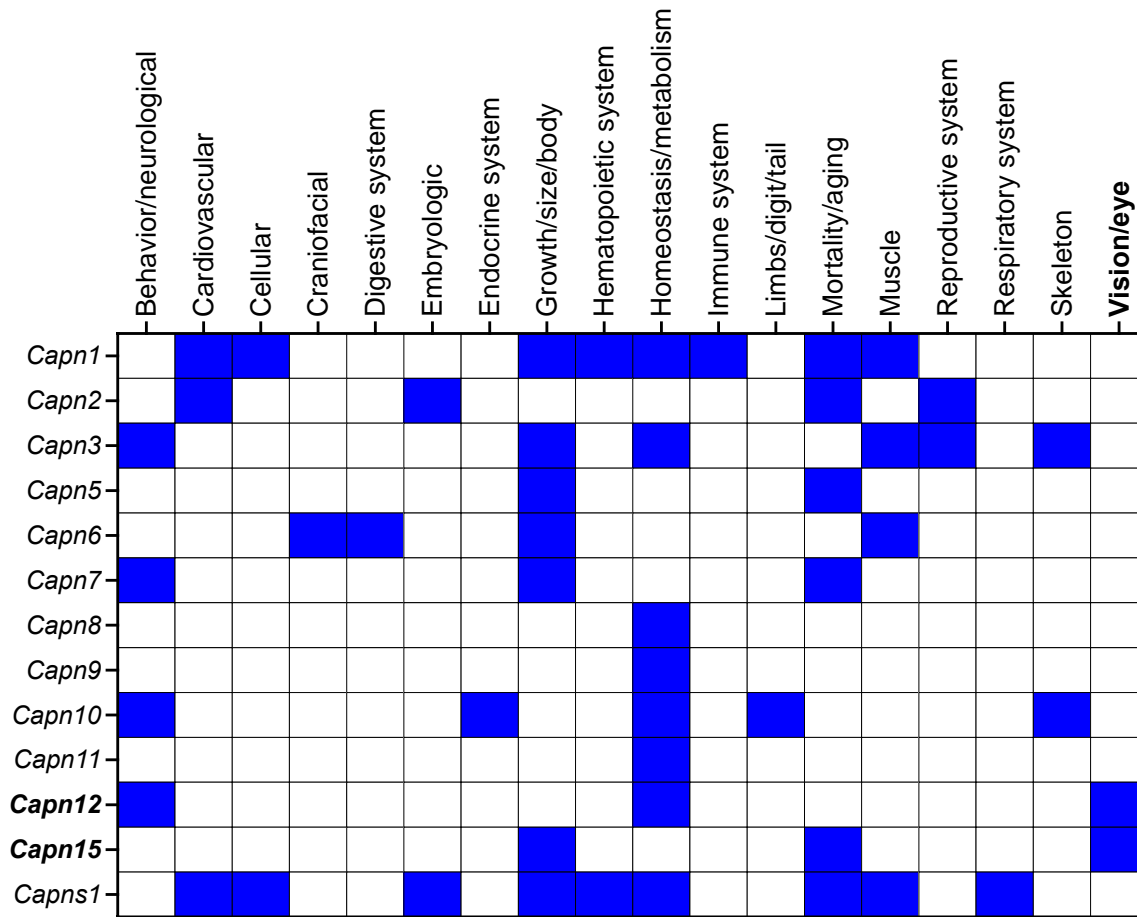

**Figure S3. Selective calpain inhibition in murine knockout models.** Interrogation of the International Mouse Phenotyping Consortium (IMPC) and the Mouse Genome Informatics (MGI) databases for calpain-related genes. Phenotypic summary data are represented as a heatmap where mouse orthologs are shown in rows and organ system phenotypes shown in columns. *Blue* indicates that deletion of the mouse ortholog is associated with a phenotype in that organ system (e.g., vision/eye). Selective deletion of two calpain orthologs (*Capn12* and *Capn15*) are associated with ocular phenotypes.

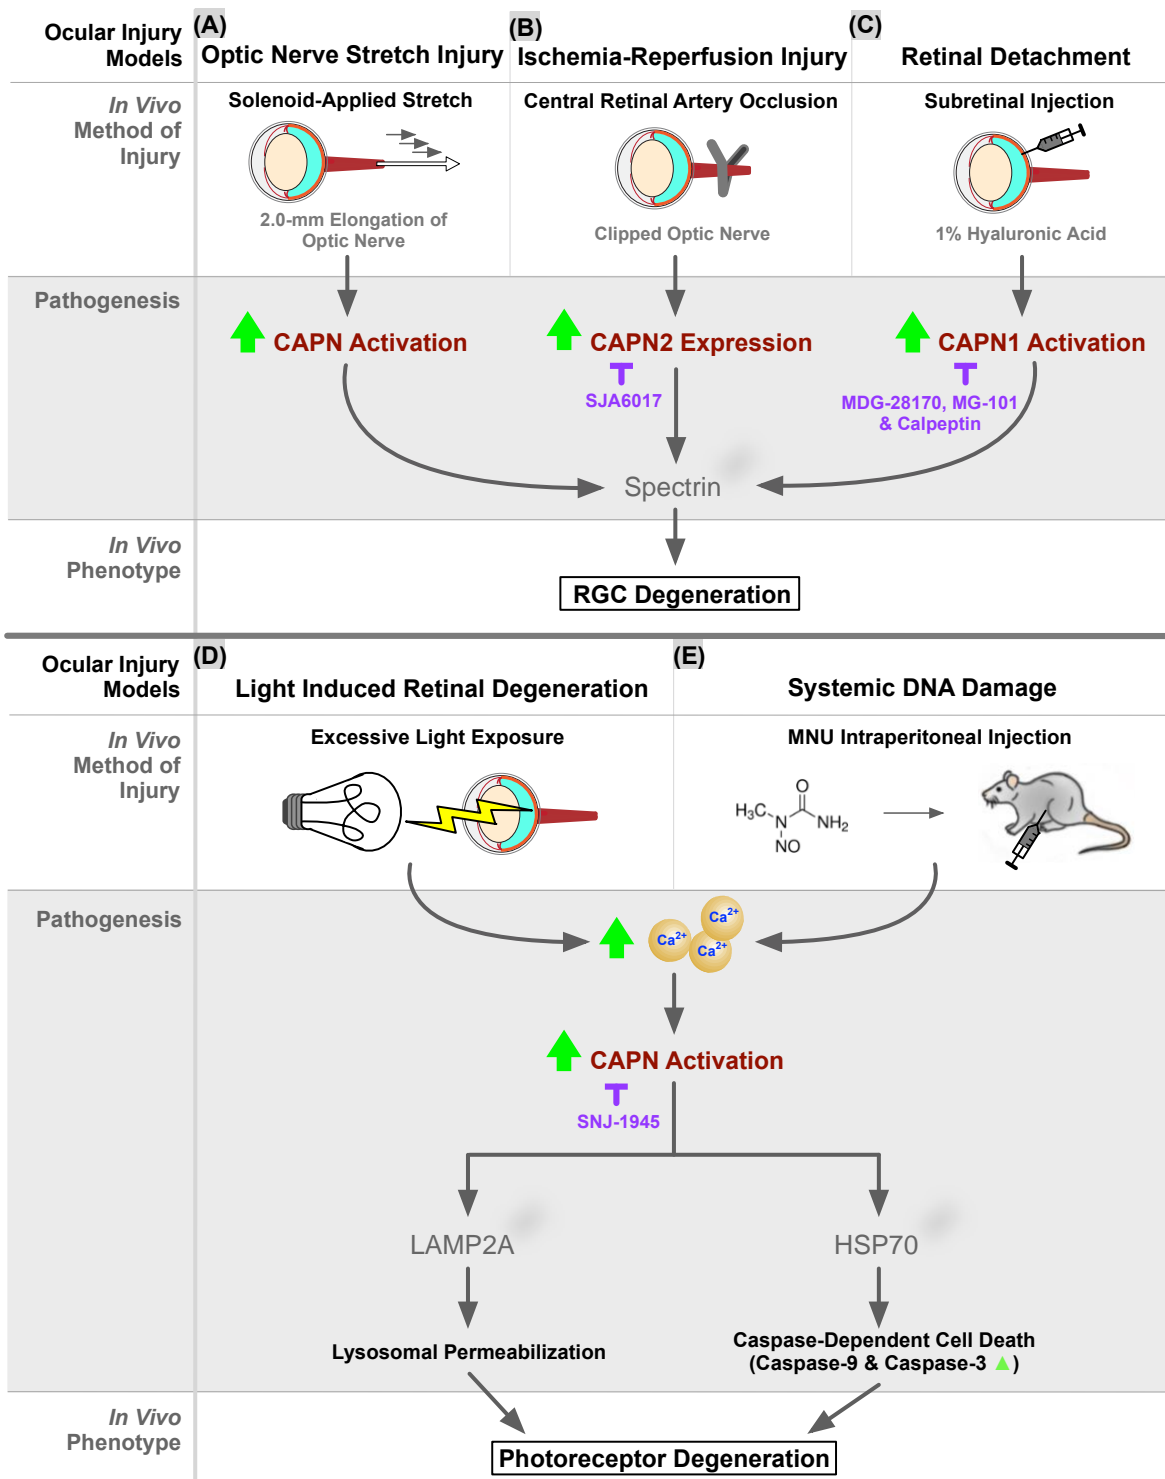

**Figure S4. Ocular injuries and cellular stress induce calpain hyperactivity.** Calpain activation is widely implicated in the damaging effects of retina injuries. In various *in vivo* models, calpain upregulation and calpain-caspase crosstalk appear to activate cell-death pathways. **(A)** In traumatic axonal injury (TAI), calpain activity was studied in mice subjected to a 2.0-mm optic nerve stretch injury using a solenoid-applied stretch [10]. In subsequent axonal degeneration, immunohistology detected calpain-mediated proteolysis of the cytoskeletal protein, spectrin, implicating calpains as early mediators of TAI that contribute to progressive intra-axonal structural damage. **(B)** Calpain activity is also implicated in retinal ischemia-reperfusion injury [11]. In a

relevant model, *CAPN1* mRNA expression, which was downregulated immediately after injury (i.e., central retinal artery occlusion [CRAO]-induced retinal ischemia for one hour), began to recover by day three of the subsequent seven-day reperfusion. In contrast, *CAPN2* mRNA expression was upregulated immediately after reperfusion and continued to rise after twenty-four hours. For both cases, spectrin proteolysis in the retina provided biochemical evidence that injury activated calpains. Further, treatment with a calpain inhibitor (SJA6017) following the ischemia-reperfusion event reduced the severity of cell density loss in the ganglion cell layer, indicative of the neuroprotective effect of calpain inhibition. **(C)** A rat model of retinal detachment (induced by subretinal injection with 1% hyaluronic acid [12]) demonstrated involvement of calpains in retinal injury. Mechanistically, *CAPN1* activity (measured by spectrin proteolysis) peaked at seven days post-detachment and was associated with decreased autophagy, a proxy for photoreceptor death. *In vivo* stimulation of autophagy by multiple calpain inhibitors (i.e., MDG28170, MG-101, and calpeptin) led to attenuated cleavage of spectrin, upregulation of autophagic markers (Atg5 and Atg5-12) and reduced TUNEL-positive photoreceptors. Indeed, the fact that calpain inhibitors protected photoreceptors from apoptosis and increased cell survival suggests the neuroprotective power of calpain inhibition for patients with retinal injury. **(D)** Light-induced retinal degeneration (LIRD) caused by repetitive light exposure irreversibly damages retinal photoreceptors; furthermore, light exposure can exacerbate problems in a retina already made vulnerable by degenerative diseases such as RP, AMD, and DR. Hypothetically, light irradiation triggers apoptotic retinal photoreceptor cell death through increased intracellular calcium-mediated calpain activation [13]. This model is advantageous to use as the damage can be controlled by light intensity and exposure duration to render roughly all photoreceptors in an animal susceptible to cell death and more rapidly than transgenic models [14]. Several LIRD models demonstrate calpain upregulation during photoreceptor cell death. For example, *CAPN5* in Müller glia of zebrafish is upregulated in response to photoreceptor degeneration induced by acute light exposure [15,16]. In a LIRD rat model, the downstream targets of activated calpain in apoptotic pathways were identified: i calpain was postulated to cleave lysosomal associated membrane protein 2 (LAMP2A) leading to lysosomal permeabilization and subsequent cell death [17,18]. Importantly, SNJ-1945, a calpain inhibitor, protected eye function in a mouse model of LIRD (as measured by ERG and retina-histology) [19]. Indeed, LIRD models hold considerable value when probing the precise mechanisms of calpains in retinal degeneration. **(E)** *N*-methyl-*N*-nitrosourea (MNU) is an alkylating agent used in animal models to induce retinal degeneration. By methylating DNA, MNU kills only the photoreceptor cells in the RPE [20], a process that in turn activates the convergence of calpain/calcium and lipid peroxidation, and finally cell death. When MNU was intraperitoneally injected into rats, retinal intracellular calcium ion levels rose, as did calpain activity [21]. Moreover, the same study found that calpain inhibition with oral SNJ-1945 protected MNU-treated rats from photoreceptor cell loss, confirming calpain involvement in photoreceptor degeneration. Similar to rats, intraperitoneally injection of MNU into mice resulted in photoreceptor cell death which was ameliorated by treatment with SNJ-1945 [22]. Finally, another study corroborated this result: inhibiting calpain by MG-101 prevented MNU-induced photoreceptor cell death by suppressing the cleavage of heat-shock protein 70 (HSP70) [23].

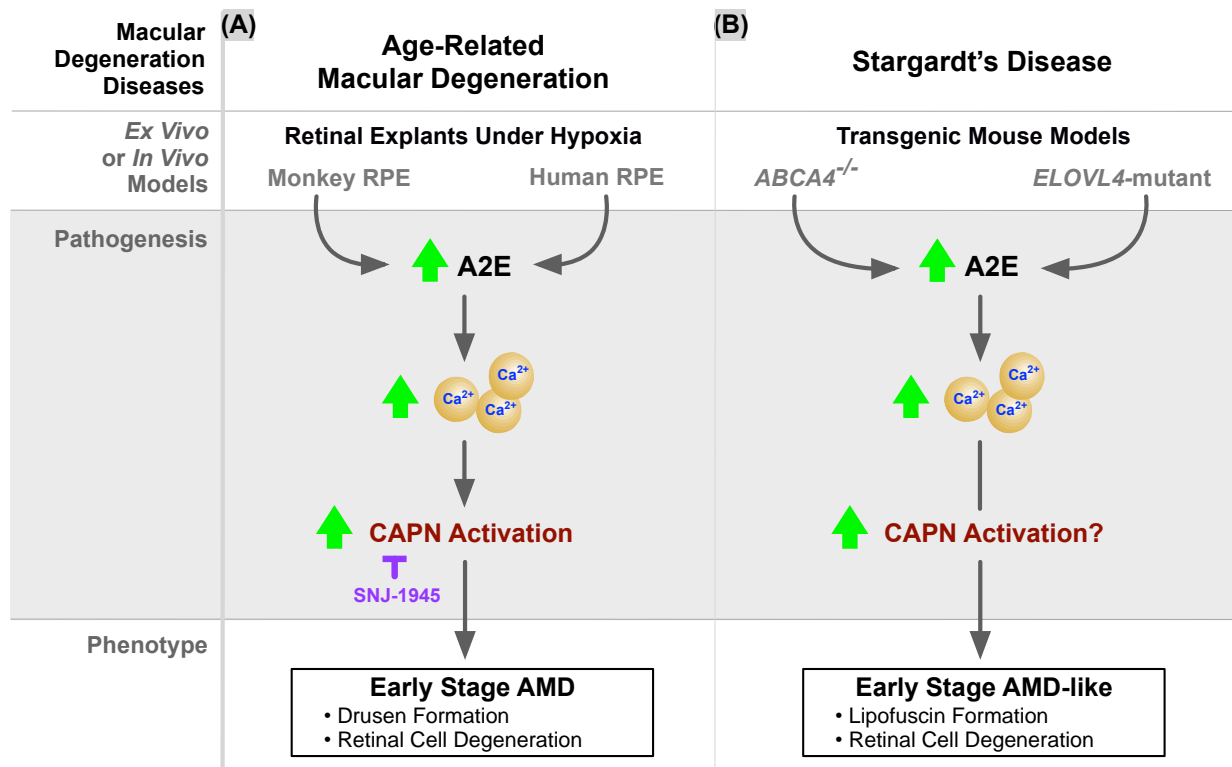

**Figure S5. Age-related macular degeneration (AMD) and calpains.** (A) Calpains were upregulated in age-related macular degeneration *ex vivo* and *in vivo* models. When primary retinal pigment epithelium cells (RPE) were subject to hypoxia, A2E—a principal component of drusen—increased, which was also found to increase calpain activation. A2E has been shown in a separate study to increase cytosolic calcium concentrations, which potentially further activates calpains. However, there are severe limitations to animal models of AMD. First, they do not fully mimic all stages of the human disease [24]. In addition, rodents lack a macula, therefore although they are cost effective and easy to genetically manipulate, they model only a limited range of AMD phenotypes. Further, non-human primates (NHP), which possess a macula, are expensive to maintain, difficult to genetically engineer, require a long-time course for disease progression and only develop early to intermediate stages of AMD (drusen, geographic atrophy) [25,26]. Therefore, advanced forms of AMD (neovascularization) must be induced by laser exposure or intravitreal injection with DL-alpha-aminodipic acid, for example. (B) Stargardt's disease is one of the most common forms of early-onset macular degeneration and is most often caused by mutations in genes *ABCA4* and *ELOVL4*. In photoreceptor cells, both *ABCA4* and *ELOVL4* play important roles in the visual cycle (visual phototransduction that converts light into electrical signals) by chemically regulating retinal/retinoid molecules. A key indicator of a dysfunctional RPE layer is the presence of lipofuscin, sub-retinal deposits of lipids and proteins. The principal component of lipofuscin is A2E as it is of drusen formation in AMD. Experimentally, *ABCA4* knock-out mice [27-29] and *ELOVL4* mutant knock-in mice (comparable to early-onset AMD) [30] develop a Stargardt's disease-like phenotype: A2E and lipofuscin accumulates in RPE, leading to eventual apoptosis of the RPE and overlying photoreceptors.

## References

1. Power, M.J. *et al.* (2020) Systematic spatiotemporal mapping reveals divergent cell death pathways in three mouse models of hereditary retinal degeneration. *J Comp Neurol* 528, 1113-1139. 10.1002/cne.24807
2. Sothilingam, V. *et al.* (2015) Retinitis pigmentosa: impact of different Pde6a point mutations on the disease phenotype. *Hum Mol Genet* 24, 5486-5499. 10.1093/hmg/ddv275
3. Power, M. *et al.* (2020) Cellular mechanisms of hereditary photoreceptor degeneration - Focus on cGMP. *Prog Retin Eye Res* 74, 100772. 10.1016/j.preteyeres.2019.07.005
4. Chang, B. *et al.* (2009) A homologous genetic basis of the murine cpfl1 mutant and human achromatopsia linked to mutations in the PDE6C gene. *Proc Natl Acad Sci U S A* 106, 19581-19586. 10.1073/pnas.0907720106
5. Trifunović, D. *et al.* (2010) cGMP-dependent cone photoreceptor degeneration in the cpfl1 mouse retina. *J Comp Neurol* 518, 3604-3617. 10.1002/cne.22416
6. Kutluer, M. *et al.* (2020) Targeting molecular pathways for the treatment of inherited retinal degeneration. *Neural Regen Res* 15, 1784-1791. 10.4103/1673-5374.280303
7. Comitato, A. *et al.* (2014) Activation of Bax in three models of retinitis pigmentosa. *Invest Ophthalmol Vis Sci* 55, 3555-3562. 10.1167/iovs.14-13917
8. Beryozkin, A. *et al.* (2021) A new mouse model for retinal degeneration due to Fam161a deficiency. *Sci Rep* 11, 2030. 10.1038/s41598-021-81414-1
9. Newton, F. and Megaw, R. (2020) Mechanisms of Photoreceptor Death in Retinitis Pigmentosa. *Genes (Basel)* 11. 10.3390/genes11101120
10. Saatman, K.E. *et al.* (2003) Traumatic axonal injury results in biphasic calpain activation and retrograde transport impairment in mice. *J Cereb Blood Flow Metab* 23, 34-42. 10.1097/01.WCB.0000035040.10031.B0
11. Sakamoto, Y.R. *et al.* (2000) Involvement of calpain isoforms in ischemia-reperfusion injury in rat retina. *Curr Eye Res* 21, 571-580
12. Chinskey, N.D. *et al.* (2014) Control of photoreceptor autophagy after retinal detachment: the switch from survival to death. *Invest Ophthalmol Vis Sci* 55, 688-695. 10.1167/iovs.13-12951
13. Yang, L.P. *et al.* (2008) Endoplasmic reticulum stress is activated in light-induced retinal degeneration. *J Neurosci Res* 86, 910-919. 10.1002/jnr.21535
14. Nguyen, A.T. *et al.* (2012) Calpain and photoreceptor apoptosis. *Adv Exp Med Biol* 723, 547-552. 10.1007/978-1-4614-0631-0\_69
15. Coomer, C.E. and Morris, A.C. (2018) Capn5 Expression in the Healthy and Regenerating Zebrafish Retina. *Invest Ophthalmol Vis Sci* 59, 3643-3654. 10.1167/iovs.18-24278
16. Schaefer, K. *et al.* (2017) Calpain-5 gene expression in the mouse eye and brain. *BMC Res Notes* 10, 602. 10.1186/s13104-017-2927-8



17. Chahory, S. *et al.* (2004) The LEI/L-DNase II pathway is activated in light-induced retinal degeneration in rats. *Neurosci Lett* 367, 205-209. 10.1016/j.neulet.2004.06.004
18. Villalpando Rodriguez, G.E. and Torriglia, A. (2013) Calpain 1 induce lysosomal permeabilization by cleavage of lysosomal associated membrane protein 2. *Biochim Biophys Acta* 1833, 2244-2253. 10.1016/j.bbamcr.2013.05.019
19. Imai, S. *et al.* (2010) Calpain inhibitor protects cells against light-induced retinal degeneration. *J Pharmacol Exp Ther* 335, 645-652. 10.1124/jpet.110.171298
20. Christmann, M. and Kaina, B. (2000) Nuclear translocation of mismatch repair proteins MSH2 and MSH6 as a response of cells to alkylating agents. *J Biol Chem* 275, 36256-36262. 10.1074/jbc.M005377200
21. Oka, T. *et al.* (2007) Contribution of calpains to photoreceptor cell death in N-methyl-N-nitrosourea-treated rats. *Exp Neurol* 204, 39-48. 10.1016/j.expneurol.2006.09.011
22. Kuro, M. *et al.* (2011) Calpain inhibition restores basal autophagy and suppresses MNU-induced photoreceptor cell death in mice. *In Vivo* 25, 617-623
23. Koriyama, Y. *et al.* (2014) Heat shock protein 70 induction by valproic acid delays photoreceptor cell death by N-methyl-N-nitrosourea in mice. *J Neurochem* 130, 707-719. 10.1111/jnc.12750
24. Pennesi, M.E. *et al.* (2012) Animal models of age related macular degeneration. *Mol Aspects Med* 33, 487-509. 10.1016/j.mam.2012.06.003
25. Rho, J. *et al.* (2021). An Overview of Age-Related Macular Degeneration: Clinical, Pre-Clinical Animal Models and Bidirectional Translation. An Overview of Age-Related Macular Degeneration: Clinical, Pre-Clinical Animal Models and Bidirectional Translation. IntechOpen
26. Patel, C. *et al.* (2020) Primate model of chronic retinal neovascularization and vascular leakage. *Exp Eye Res* 195, 108031. 10.1016/j.exer.2020.108031
27. Arunkumar, R. *et al.* (2021) Lutein and zeaxanthin reduce A2E and iso-A2E levels and improve visual performance in Abca4. *Exp Eye Res* 209, 108680. 10.1016/j.exer.2021.108680
28. Charbel Issa, P. *et al.* (2015) Rescue of the Stargardt phenotype in Abca4 knockout mice through inhibition of vitamin A dimerization. *Proc Natl Acad Sci U S A* 112, 8415-8420. 10.1073/pnas.1506960112
29. Zeiss, C.J. (2010) Animals as models of age-related macular degeneration: an imperfect measure of the truth. *Vet Pathol* 47, 396-413. 10.1177/0300985809359598
30. Vasireddy, V. *et al.* (2009) Elovl4 5-bp deletion knock-in mouse model for Stargardt-like macular degeneration demonstrates accumulation of ELOVL4 and lipofuscin. *Exp Eye Res* 89, 905-912. 10.1016/j.exer.2009.07.021
